# Supplementary material for: Enhanced Adsorption of Sulfonamides by Attapulgite-Doped Biochar Prepared with Calcination
Source: MDPI journal article supplement (doi:10.3390/molecules27228076), 2022-11-21
Supplement: s1 [file s1]

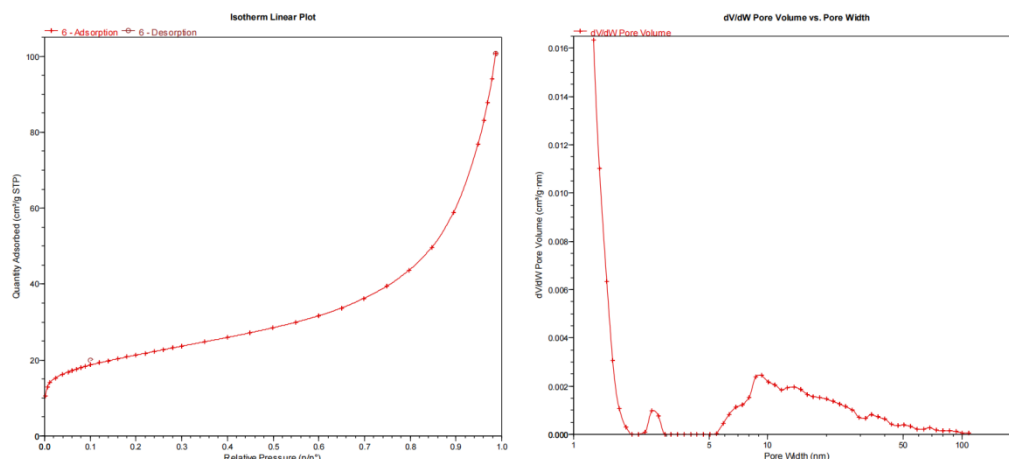

**Figure S1.** The adsorption-desorption isotherm and pore size distribution of ATP.

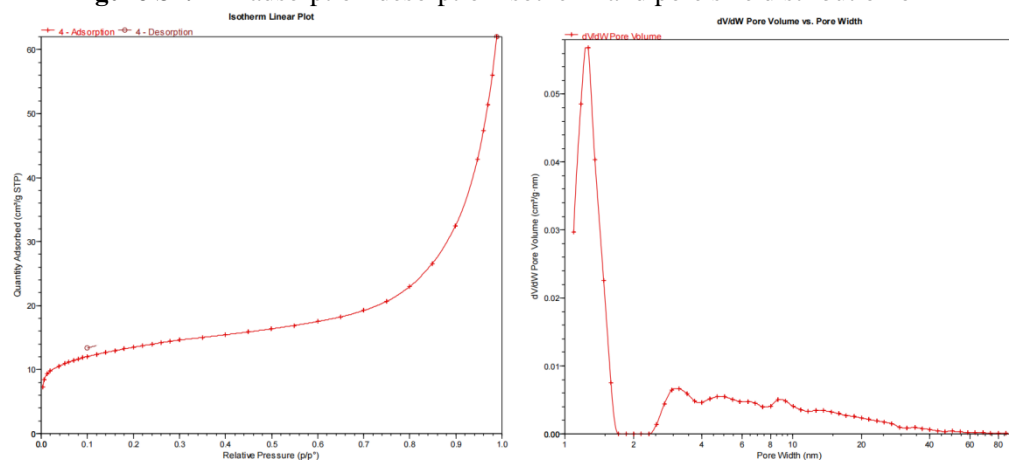

**Figure S2.** The adsorption-desorption isotherm and pore size distribution of BC.

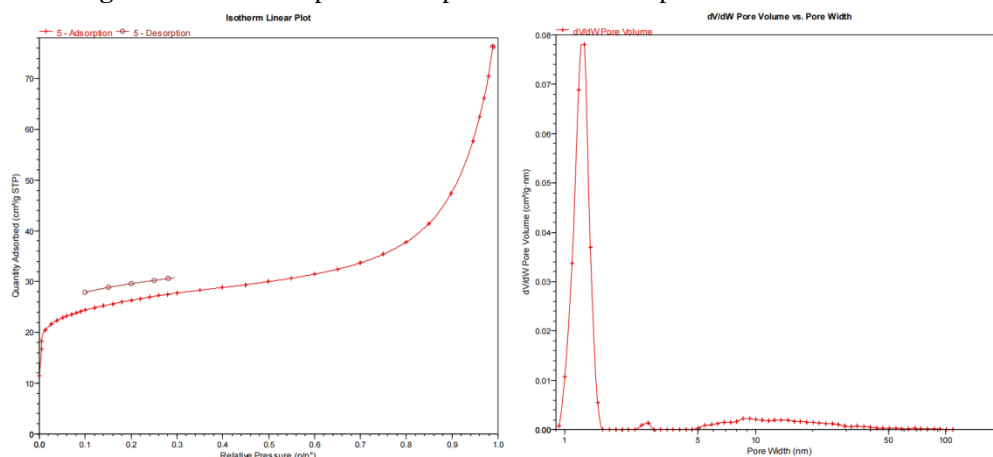

**Figure S3.** The adsorption-desorption isotherm and pore size distribution of ATP/BC-0.01.

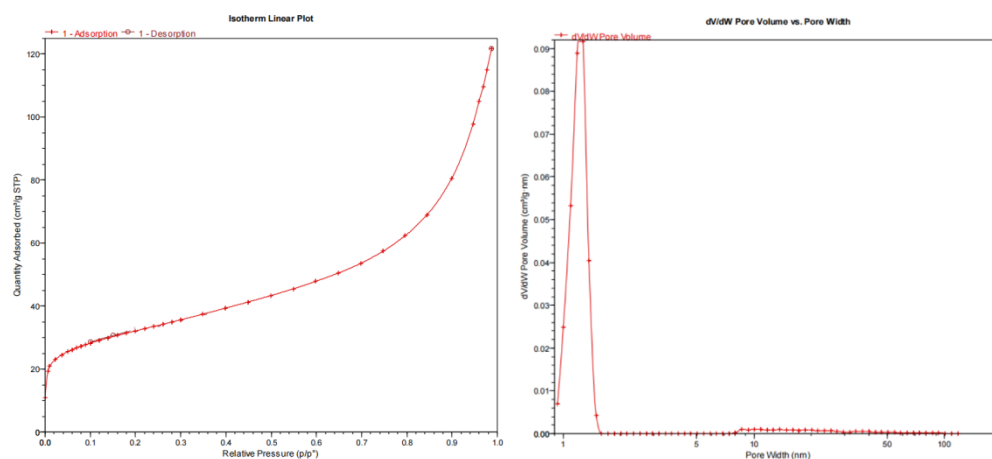

**Figure S4.** The adsorption-desorption isotherm and pore size distribution of ATP/BC-0.1.

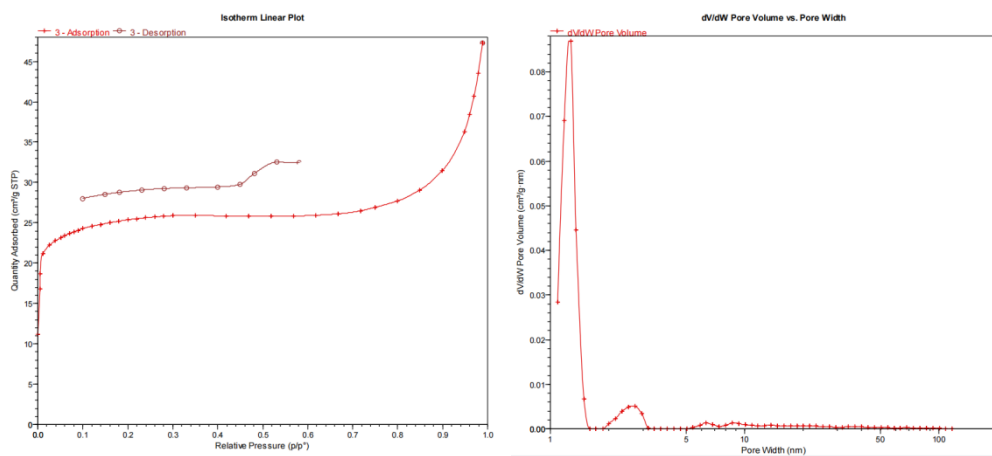

**Figure S5.** The adsorption-desorption isotherm and pore size distribution of ATP/BC-0.3.

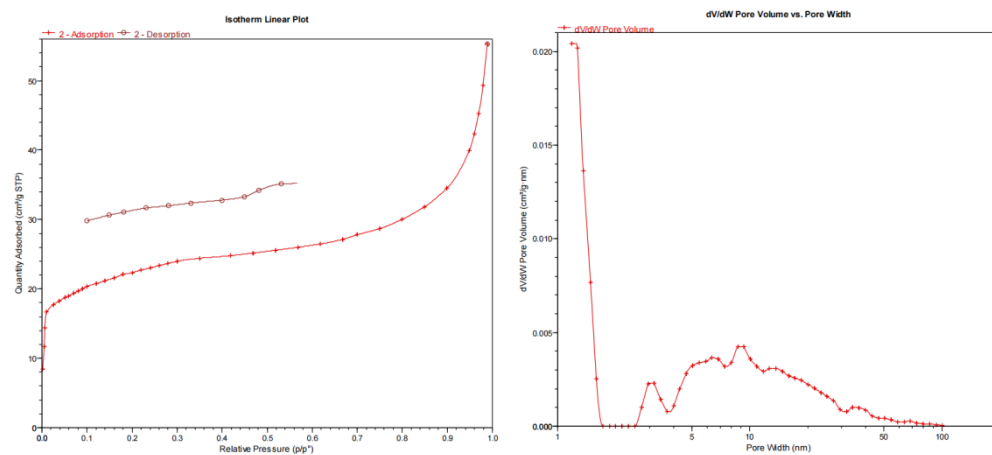

**Figure S6.** The adsorption-desorption isotherm and pore size distribution of ATP/BC-0.5.

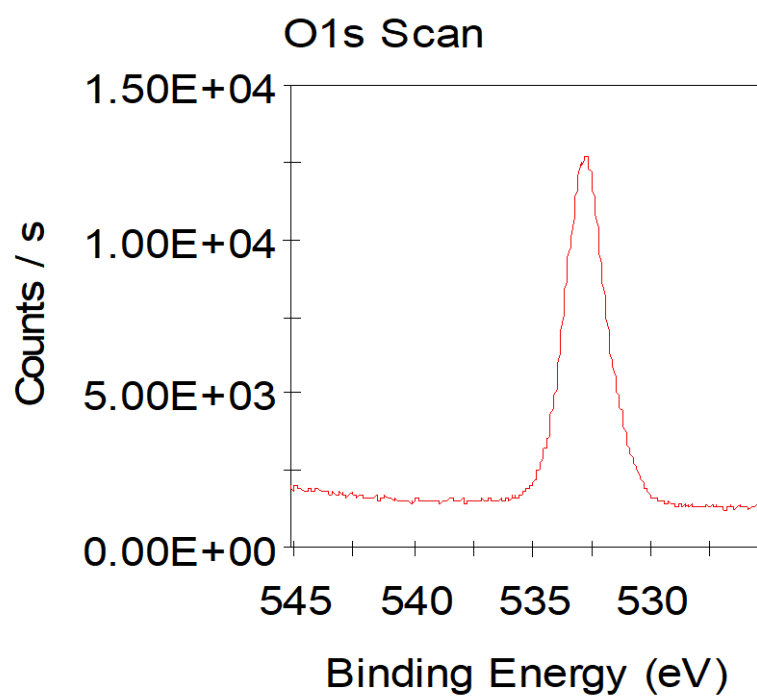

**Figure S7.** The XPS O1s scan of BC.

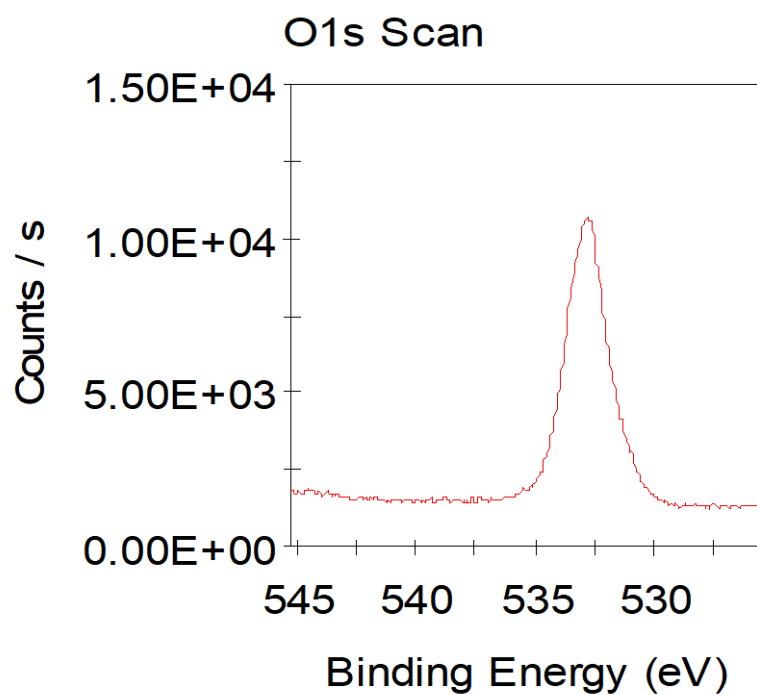

**Figure S8.** The XPS O1s scan of ATP/BC.
